# Supplementary material for: Diversity of Vaginal Microbiota Affects Epithelial Barrier Permeability Among African Pregnant Women
Source: Research Square preprint supplement (doi:10.21203/rs.3.rs-218032/v1), 2021-02-22
Supplement: Supplementary file 1 [file 47cff859628bcd852df0bc4b.docx]

Supplemental Digital Content 3

| A | B |
| --- | --- |
| C | D |
| E | F |
| **Figure S2: Expression of tight junction proteins in response to cell-free bacterial supernatants.** **A** shows the levels of junction proteins, claudin-4 and E-cadherin, in relation to beta tubulin as measured by western blot. Protein bands (not shown) were quantified by the gel analyzer tool in the Fiji distribution of ImageJ (version 1.52p). **B-F** show the change in mRNA levels of the tight junctions F11R, claudin-1 and 4, occludin and ZO-1 respectively, due to treatment of vaginal epithelial tissues with bacterial cell-free supernatant. LAB was *L. iners* and *L. crispatus* cell-free supernatant and non-LAB was *G. vaginalis* onlyand *G. vaginalis* combined with either *L. iners* or *L. crispatus*. When treatments were compared to media or between each other, there was no statistically significant difference. | |
